# Supplementary material for: A stochastic, local mode study of neon–liquid surface collision dynamics
Source: Royal Society of Chemistry journal article supplement (doi:10.1039/c0cp00787k), 2010-11-01

## Supporting Figures for Section 4

## Supporting Figure 1

Angular distributions for a  $29 \text{ kJ mol}^{-1}$  neon atom striking a 290 K squalane surface computed with A.  $\rho = 0.006$ , B.  $\rho = 0.009$ , C.  $\rho = 0.012$ , and D.  $\rho = 0.016$ , with all other parameters held at the values given in Table 1. The histograms A, B, and D were plotted from 2000 solutions to the equations of motion. Figure C is the same as Fig. 5 of the main paper.

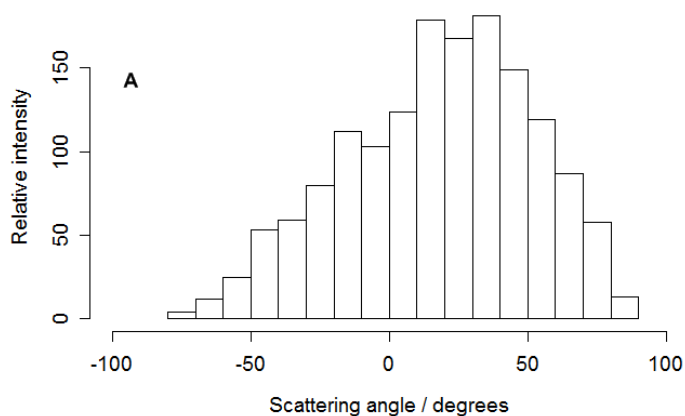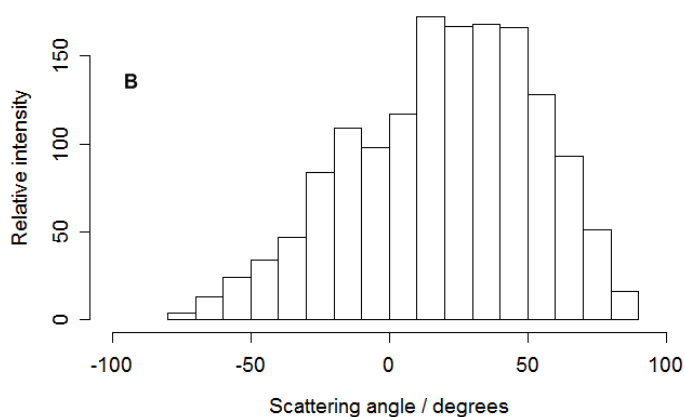

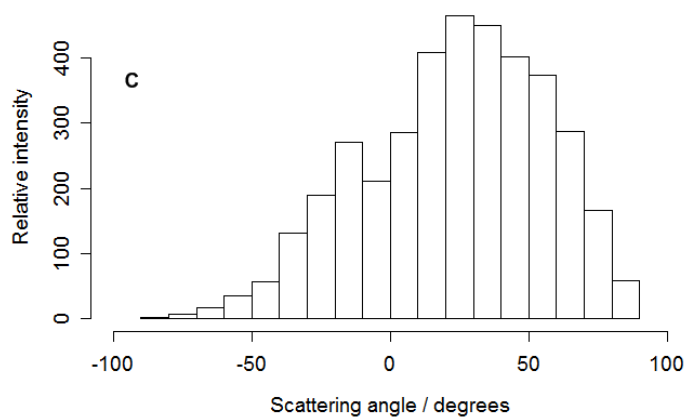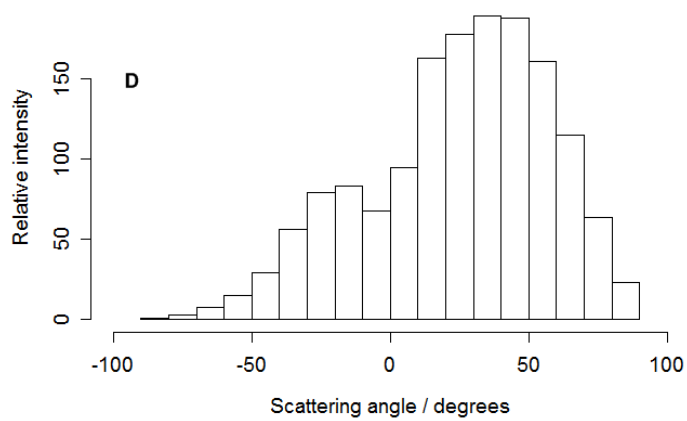

## Supporting Figure 2

Angular distributions for a  $29 \text{ kJ mol}^{-1}$  neon atom striking a 290 K squalane surface computed with A.  $h = 0.6d$ , B.  $h = 0.7d$ , C.  $h = 0.75d$ , D.  $h = 0.8d$  and E.  $h = 0.85d$ , where  $d$  is the diameter of a squalane surface molecule, with all other parameters held at the values given in Table 1 and  $\rho = 0.012$ . The histograms A, B, and D were plotted from 2000 solutions to the equations of motion. Figure C is the same as Fig. 5 of the main paper.

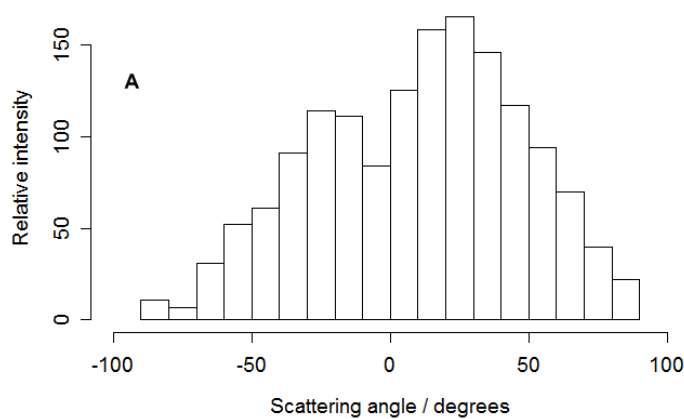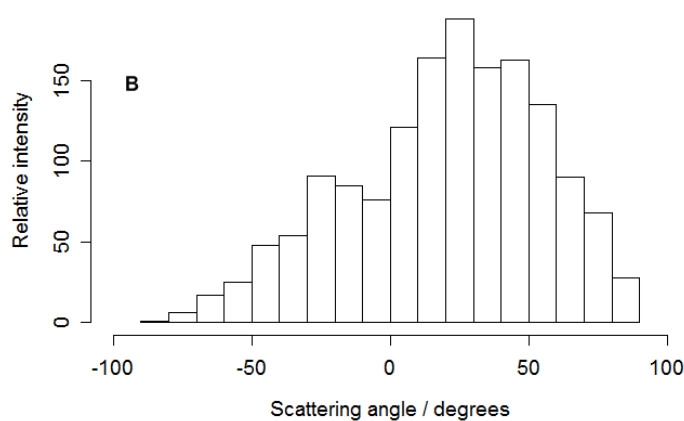

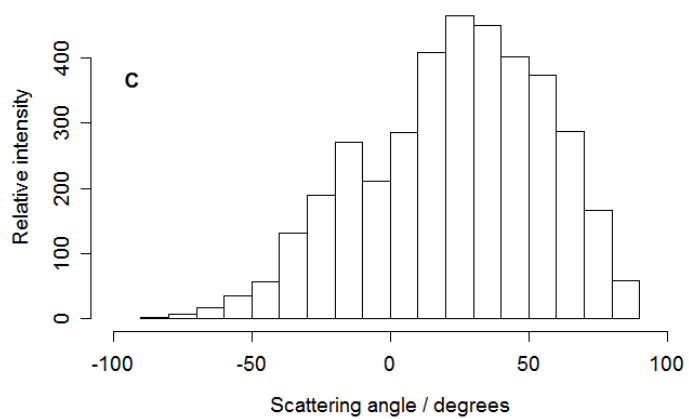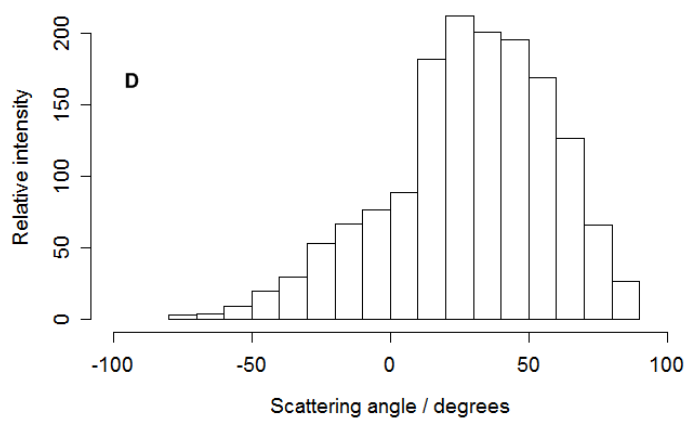

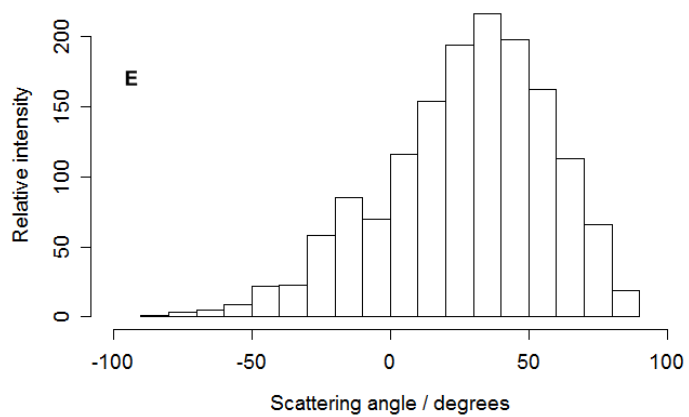

## Supporting Figure 3

Angular distributions for a  $29 \text{ kJ mol}^{-1}$  neon atom striking a 290 K squalane surface computed with A.  $\gamma =$  half the squalane surface tension, B.  $\gamma =$  the squalane surface tension, and C.  $\gamma =$  twice the squalane surface tension, with  $\rho = 0.012$  and all other parameters held at the values given in Table 1. The histograms A, and C were plotted from 2000 solutions to the equations of motion. Figure B is the same as Fig. 5 of the main paper.

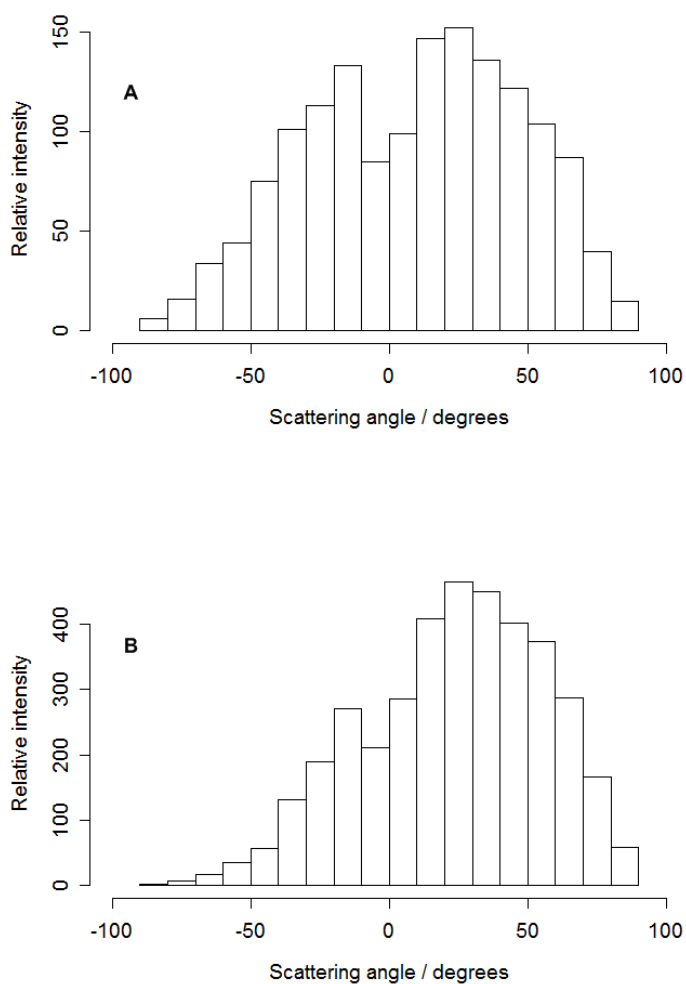

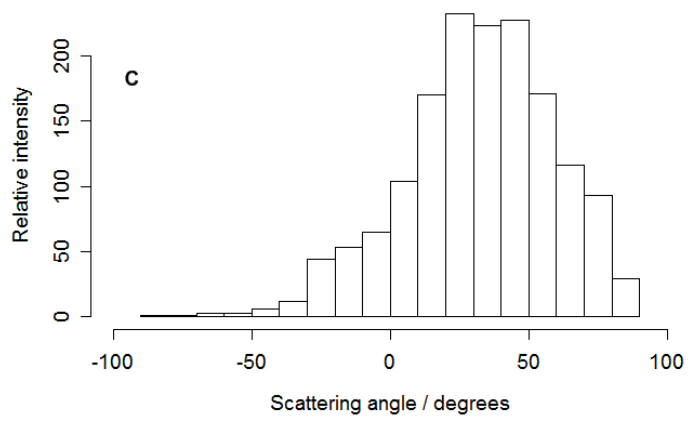

Supplement: c0cp00787k-sifig.pdf [file c0cp00787k-sifig.pdf]
