# Supplementary material for: A stochastic, local mode study of neon–liquid surface collision dynamics
Source: Royal Society of Chemistry journal article supplement (doi:10.1039/c0cp00787k), 2010-11-01
Supplement: c0cp00787k-sitab.pdf [file c0cp00787k-sitab.pdf]

|          |                                |       |       |                   |
|----------|--------------------------------|-------|-------|-------------------|
| Table a: | $\theta^a$ / degrees           | $N_1$ | $M_1$ | $f_{\text{trap}}$ |
|          | 25                             | 93 %  | 71%   | 22 %              |
|          | 45                             | 91 %  | 67 %  | 24 %              |
|          | 65                             | 88 %  | 66 %  | 17 %              |
| Table b: | $E_t^b$ / kJ mol <sup>-1</sup> | $N_1$ | $M_1$ | $f_{\text{trap}}$ |
|          | 10                             | 94 %  | 35 %  | 56 %              |
|          | 29                             | 91 %  | 67 %  | 24 %              |
|          | 50                             | 89 %  | 71 %  | 18 %              |
| Table c: | $T$ / K                        | $N_1$ | $M_1$ | $f_{\text{trap}}$ |
|          | 290                            | 91 %  | 67 %  | 24 %              |
|          | 350                            | 91 %  | 67 %  | 20 %              |
| Table d: | $\rho$                         | $N_1$ | $M_1$ | $f_{\text{trap}}$ |
|          | 0.006                          | 93 %  | 65 %  | 25 %              |
|          | 0.009                          | 93 %  | 67 %  | 23 %              |
|          | 0.012                          | 91 %  | 67 %  | 24 %              |
|          | 0.015                          | 94 %  | 68 %  | 23 %              |
| Table e: | $k^*$                          | $N_1$ | $M_1$ | $f_{\text{trap}}$ |
|          | 0.6                            | 92 %  | 68 %  | 23 %              |
|          | 0.7                            | 91 %  | 66 %  | 25 %              |
|          | 0.75                           | 91 %  | 67 %  | 24 %              |
|          | 0.8                            | 91 %  | 63 %  | 25 %              |
|          | 0.85                           | 93 %  | 68 %  | 24 %              |
| Table f: | $\gamma^\ddagger$              | $N_1$ | $M_1$ | $f_{\text{trap}}$ |
|          | 5                              | 96 %  | 71 %  | 23 %              |
|          | 2                              | 94 %  | 71 %  | 21 %              |
|          | 1                              | 91 %  | 67 %  | 24 %              |
|          | 0.5                            | 92 %  | 66 %  | 25 %              |
|          | 0.2                            |       |       |                   |
| Table g: | $\varepsilon^\ddagger$         | $N_1$ | $M_1$ | $f_{\text{trap}}$ |
|          | 1                              | 91 %  | 67 %  | 24 %              |
|          | 3                              | 93 %  | 34 %  | 58 %              |
|          | 5                              | 95 %  | 14 %  | 80 %              |
| Table h: | Energy loss                    | $N_1$ | $M_1$ | $f_{\text{trap}}$ |
|          | Elastic                        | 88 %  | 86 %  | 0 %               |
|          | Inelastic                      | 91 %  | 67 %  | 24 %              |
| Table i: | Surface                        | $N_1$ | $M_1$ | $f_{\text{trap}}$ |
|          | Squalane                       | 91 %  | 67 %  | 24 %              |
|          | PFPE                           | 89 %  | 62 %  | 27 %              |

Supporting Table: Dynamical statistics for various values of the calculation parameters, as calculated from samples of 500 trajectories.  $N_1$  is the fraction of trajectories undergoing only one collision with the surface,  $M_1$  is the fraction which undergo only one turning point, and  $f_{\text{trap}}$  is the fraction that become trapped at the surface. <sup>\*</sup>  $k$  is in units of the squalane molecular diameter (10.2 Å; reference 12), <sup>†</sup>  $\varepsilon$  in units of the squalane well depth (3.86 kJ mol<sup>-1</sup>; reference 17) and <sup>‡</sup>  $\gamma$  in units of the squalane surface tension (26 mN m<sup>-1</sup>; reference 29). <sup>a</sup>  $\rho$  calculated by scaling 45° value;  $\rho = 0.012(\sin \theta / \sin 45^\circ)$ . <sup>b</sup>  $\rho$  calculated by scaling 29 kJ mol<sup>-1</sup> value;

$$\rho = 0.012(E_i / 29 \text{ kJ mol}^{-1})^{1/2}$$
